# Supplementary material for: Beneficial effects of tensile strain on charge carrier lifetime in metal halide perovskites containing halogen vacancies
Source: Royal Society of Chemistry journal article supplement (doi:10.1039/d3tc02828c), 2023-01-01
Supplement: d3tc02828c1.pdf [file d3tc02828c1.pdf]

## Supporting Information

### Beneficial Effects of Tensile Strain on Charge Carrier Lifetime in Metal Halide Perovskites Containing Halogen Vacancies

Zhiguo Wang,<sup>1</sup> Pingzhi Zhang,<sup>1</sup> Wei Wei,<sup>2\*</sup> Wei Li<sup>1\*</sup>

<sup>1</sup>*School of Chemistry and Materials Science, Hunan Agricultural University, Changsha, PR China*

<sup>2</sup>*Institute of Theoretical Chemistry, College of Chemistry, Jilin University, 2 Liutiao Road, Changchun 130023, P. R. China*

Corresponding author:

[weiweiww@jlu.edu.cn](mailto:weiweiww@jlu.edu.cn) (W.W.)

[weili@hunau.edu.cn](mailto:weili@hunau.edu.cn) (W.L.)

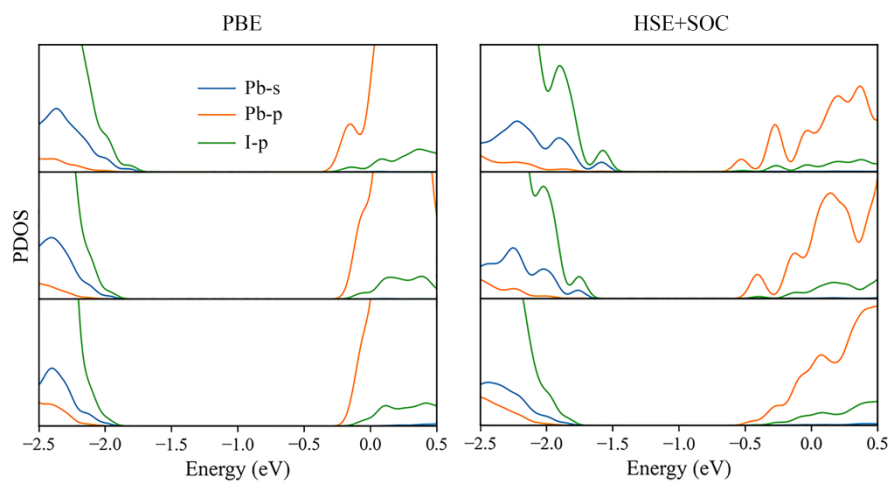

**Figure S1.** Projected density of states (PDOS) calculated using GGA-PBE and HSE+SOC calculations for **(top)**  $I_v$ , **(middle)**  $I_v@2.5\%$ , **(bottom)**  $I_v@5\%$  systems, respectively.

**Table S1. The calculated energy levels of VBM, trap, and CBM using PBE and HSE+SOC level of theory.**

|                      |      | Eg (eV) |         |
|----------------------|------|---------|---------|
|                      |      | PBE     | HSE+SOC |
| I <sub>v</sub>       | VBM  | 0.94    | 0.67    |
|                      | trap | 2.57    | 2.34    |
|                      | CBM  | 2.75    | 2.59    |
| I <sub>v</sub> @2.5% | VBM  | 0.31    | 0.04    |
|                      | trap | 2.17    | 1.91    |
|                      | CBM  | 2.21    | 2.05    |
| I <sub>v</sub> @5%   | VBM  | -0.13   | -0.39   |
|                      | trap | 1.75    | 1.65    |
|                      | CBM  | 1.78    | 1.73    |
